1 **Sub-3 Å resolution structure of apoferritin using a multi-purpose TEM with a side-entry**  
2 **cryo-holder**

3  
4 Yoko Kayama<sup>§,1,2</sup> Raymond N. Burton-Smith<sup>§,1</sup>, Chihong Song<sup>1</sup>, Naoya Terahara<sup>3</sup>, Takayuki  
5 Kato<sup>4</sup>, Kazuyoshi Murata<sup>1\*</sup>

6  
7 <sup>1</sup>National Institute for Physiological Sciences, Okazaki, Aichi, 444-8585, Japan, <sup>2</sup>Terabase Inc.,  
8 Okazaki, Aichi, 444-0864, Japan, <sup>3</sup>Faculty of Science and Engineering, Chuo University,  
9 Bunkyo-ku, Tokyo, 112-8551, Japan, <sup>4</sup>Institute for Protein Research, Osaka University, Suita,  
10 Osaka, 565-0871, Japan

11  
12 <sup>§</sup>These authors contributed equally

13 \*Correspondence: [kazum@nips.ac.jp](mailto:kazum@nips.ac.jp)

14  
15 **Summary**

16 The structural analysis of protein complexes by cryo-electron microscopy (cryo-EM) single  
17 particle analysis (SPA) has had great impact as a biophysical method in recent years. Many results  
18 of cryo-EM SPA are based on state-of-the-art cryo-electron microscopes customized for SPA.  
19 These are currently only available in limited locations around the world, where securing machine  
20 time is highly competitive. One potential solution for this time-competitive situation is to reuse  
21 existing multi-purpose equipment. Here, we used a multi-purpose TEM with a side entry cryo-  
22 holder at our facility to evaluate the potential of high-resolution SPA. We report a 3 Å resolution  
23 map of apoferritin with local resolution extending to 2.6 Å. The map clearly showed two positions  
24 of an aromatic side chain. We also verified the optimal imaging conditions depending on different  
25 electron microscope and camera combinations. This study demonstrates the possibilities of more  
26 widely available and established electron microscopes, and their applications for cryo-EM SPA.

27  
28 **Keywords**

29 apoferritin; benchmarking; cryo-electron microscopy; multi-purpose TEM; single particle  
30 analysis; side-entry cryo-holder

31

## 32 **Introduction**

33 Cryo-electron microscopy (cryo-EM) single particle analysis (SPA) is a technique for  
34 reconstructing the three-dimensional structure of a biomacromolecule using projected images  
35 acquired with an electron microscope (Bhella, 2019) and was the subject of the Nobel Prize for  
36 Chemistry in 2017 (Cressey and Callaway, 2017). The technique has achieved tremendous  
37 progress by integrating various technologies (Murata and Wolf, 2018).

38 Developments contributing to advances in SPA have been mainly improvements of electron  
39 microscope performance (Knapek et al., 1982; Morishita et al., 2013), developments of electron  
40 beam direct detectors (Bammes et al., 2012; McMullan et al., 2016), methods for three-  
41 dimensional structure reconstructions (Grant et al., 2018; Kimanius et al., 2016; Punjani et al.,  
42 2017; Zivanov et al., 2018), and automated acquisition via Legion (Carragher et al., 2000),  
43 SerialEM (Mastronarde, 2005) or manufacturer software. In recent years, close to atomic  
44 resolution has been achieved (Bartesaghi et al., 2015; Danev et al., 2019; Kato et al., 2019) which  
45 permits construction of atomic models without foreknowledge of the protein sequence.

46 All the above-mentioned techniques are indispensable for improving achieved resolution.  
47 However, focusing on the performance of the electron microscope, including electron source, the  
48 sample stage, and the detector is arguably the primary limiting factor. For example, autoloader  
49 stages such as those used in Titan Krios (Thermo Fisher Scientific) and CRYOARM (JEOL)  
50 microscopes demonstrate that multiple sample grids can be stored stably for a long period of time,  
51 the sample grid can be automatically transported, and data can be automatically collected without  
52 manual intervention. Such a sample stage is difficult to introduce later into a multi-purpose  
53 electron microscope and is currently only available pre-installed. Such electron microscopes are  
54 very expensive and are currently only available at limited locations. As a result, competition for  
55 machine time is high. One solution is to reuse established equipment.

56 Optimisations of the microscope for SPA are often incompatible or non-ideal for other  
57 techniques for which the microscope could be used, such as electron tomography (Baumeister,  
58 2002), EDS (Allen et al., 2012), EELS (Egerton, 2009), STEM (Crewe et al., 1970) and microED  
59 (Nannenga and Gonen, 2019). Nevertheless, the vast cost of maintaining multiple pieces of  
60 optimised equipment precludes general availability. Therefore, it is desirable to be aware of how  
61 realistic mid- to high-resolution SPA is on multi-purpose TEMs.

62 While datasets exceeding 1,000 micrographs are now regularly collected (Iudin et al., 2016),  
63 this is unrealistic for manual data collection. Therefore, in this study, limited datasets (<200  
64 micrograph movies each) were manually collected with a test specimen of apoferritin on two  
65 microscope-and-detector combinations which serve as multi-purpose (S)TEMs, both using Gatan  
66 626-type cryo-specimen holders. Apoferritin (Richter, 1959; Toussaint et al., 2007) is a relatively  
67 recent addition to the “benchmark” samples for cryo-EM, since its compact size, spherical shape  
68 and octahedral symmetry presented difficulties in reconstructing at lower resolutions (Russo and  
69 Passmore, 2014). Using a beta release of RELION 3.1 and <300 micrograph movies, a 3 Å (global)  
70 resolution map of apoferritin was achieved. We further examined optimized data collection  
71 conditions for each general purpose cryo-EM setting, although as early datasets here had been  
72 processed with RELION 3.0, we chose to continue processing these datasets with RELION 3.0,  
73 rather than introduce a further variable. The limited number of acquired micrographs is intended  
74 to offset the multiplicative effect of high symmetry on particle count and provide some indication  
75 of utility on lower symmetry datasets.

76 While not all multi-purpose TEMs are equipped with automation software, the decrease in  
77 workload for the microscope operator presented by automation, combined with the ability to  
78 collect data more quickly makes software-controlled data acquisition highly desirable. To  
79 demonstrate the utility of automation on data collection with a multi-purpose TEM which still  
80 requires manual cryogen maintenance, we acquired a dataset of  $\beta$ -galactosidase using SerialEM,  
81 post-installed automated software (Mastrorarde, 2005) and processed independently. As a result,  
82 3.6 Å resolution map was able to be acquired with one semi-automated session of data collection  
83 that took six hours with two replenishments of liquid nitrogen.

84 In this work we provide a possibility to reuse existing equipment for high-resolution cryo-EM  
85 and guidelines for the minimum setup for growth of the research field within general-access  
86 facilities.

87

## 88 **Results**

89

### 90 **3 Å resolution map reconstruction using a multi-purpose TEM with a side-entry cryo-** 91 **holder**

92 With a limited dataset of 279 micrograph movies and using a beta version of RELION 3.1, we  
93 achieved 3 Å (global) resolution of apoferritin (Fig. 1) when estimated at the gold-standard (GS)  
94 (fully independent half-maps) FSC (0.143) (Fig. S1A) using a combination of JEM-2100F electron  
95 microscope and K2 Summit direct electron detector (DED). Local resolution estimated by the  
96 *blocres* module of Bsoft (Heymann, 2001; Heymann and Belnap, 2007) shows significant areas of  
97 the map between 2.6-2.8 Å (Fig. 1A). All helices were clearly defined (Fig. 1A, B) with some  
98 residues exhibiting two conformational states (Fig. 1B, marked with black arrows) although with  
99 one conformation dominant as the second was lost at higher map  $\sigma$  (Fig. S1B). In higher resolution  
100 regions side chains are clear (Fig. 1C) and densities could be assigned to metal atoms coordinated  
101 by side chains (Fig. 1B, 1C, marked with red arrow). It may be possible to assign water to some  
102 densities, but we erred on the side of caution with respect to interpreting potential water-related  
103 density.

104

### 105 **Imaging comparison of two DEDs**

106 Photographs of one EM setup (Setting A; JEM-2100F, K2 Summit DED and Gatan 626 side entry  
107 cryo-specimen holder) are shown in Fig. S2. The second (Setting B; JEM-2200FS, DE-20 DED  
108 and Gatan 626 cryo-holder) has been shown previously (Murata and Wolf, 2018). Micrograph  
109 movies independently collected from the two EM setups were corrected for image drift and  
110 electron beam damage using the MotionCor2 algorithm (Zheng et al., 2017) as implemented in  
111 RELION 3 (Zivanov et al., 2018). Table 1 details the essential information for each equipment  
112 setting.

113 For comparison, representative cryo-EM images from each setup are shown in Fig. 2. In this  
114 figure, images were captured at 50,000 $\times$  magnification and displayed at the same particle scale. In  
115 both cases, the projected image of apoferritin particles was easily recognized with similar contrast.  
116 An area of the same absolute size as the image obtained with Setting A (K2 Summit detector)  
117 acquisition is shown on the Setting B (DE-20 detector) micrograph by a white dashed box (Fig.  
118 2B), highlighting the difference in field of view. The total number of apoferritin particles in the



119 example images were counted, totalling 383 in the Setting A image and 1,334 in the Setting B  
120 image (Fig. 2).

121 We calculated the MTF and DQE curves (Fig. S3) in each case at 200kV using a beam stopper  
122 and the FindDQE program (Ruskin et al., 2013), where the greatest difference between the curves  
123 was shown in the low frequencies. The calculated DQE value at lower special frequencies was  
124 >80% for the K2 Summit, but was reduced to ~35% when using the DE-20. At frequencies above  
125  $\frac{3}{4}$  Nyquist, the two detectors have very similar response curves (Fig. S3). They show similar  
126 characteristics to the same DEDs on different microscopes (Faruqi and McMullan, 2018; Kuijper  
127 et al., 2015; Ruskin et al., 2013) as expected.

128 When comparing Setting A and Setting B using Pt-Ir film (Hamaguchi et al., 2019) (Fig. S4)  
129 the clarity of Thon rings in Setting A is immediately apparent in the power spectrum (Fig. S4A)  
130 and in the rotational average profile (Fig. S4B) to beyond the diffraction ring of 2.27 Å. Both  
131 Settings were observed at 100,000× magnification, at which point Setting B is difficult to keep  
132 stable. This is manifest in the weaker oscillations in the CTF and diffraction ring at ~2.3 Å (Fig.  
133 S4C). Minor astigmatism of approximately 60 nm causes the blurring of the diffraction ring in  
134 Setting B upon rotational averaging, which while visible in the power spectrum is not as clear in  
135 the radial profile (Fig. S4D).

136

### 137 **Comparison of 3D reconstruction maps in different imaging conditions**

138 Eight cryo-EM maps of apoferritin with resolutions between 3.3 Å and 5.1 Å were obtained by  
139 standard operation (Fig. 3) of RELION 3.0 using different data sets as detailed in Table 2. In all  
140 final post-processing steps, a very soft mask (15 Å low-pass filter, 5 pixel expansion and 10 pixel  
141 soft edge) was used, which slightly reduces the resolution estimated by “gold-standard” FSC (GS-  
142 FSC) (Chen et al., 2013) than when a less soft mask was used. We would prefer to underestimate  
143 the GS-FSC resolution than overestimate. Local resolution is unaffected by this softer mask.

144 Using limited datasets described in Table 2, the highest resolution map was obtained from a  
145 data set acquired with Setting A at a magnification of 50,000×. The map coloured by local  
146 resolution (Heymann, 2001; Heymann and Belnap, 2007) is shown in Fig. S5. The best local  
147 resolution of ~2.8 Å was shown in the  $\alpha$ -helices located inside the core. On the other hand, the  
148 disordered N-terminal of each subunit showed the lowest resolution of ~3.6 Å.

149 A crystal structure model (PDBID: 2CIH) (Toussaint et al., 2007) was fitted to the map and a  
150 single helix was extracted from each reconstruction to visualize map quality (Fig. 4). The highest  
151 resolution map (Fig. 4C) showed good agreement with the model to confirm the secondary  
152 structure and the side chains. Similarly, Fig. 4B also shows reasonable clarity for residue side  
153 chains. The slightly lower resolution maps (Fig. 4D, F, G, H) show moderately resolved side chains.

154 The best resolution map obtained using Setting B reported 3.8 Å at 60,000× magnification, but  
155 there were some areas where the electron densities of the side chains cannot be clearly recognized;  
156 lysine and arginine residues provide examples (Fig. 4, marked with black arrows).

157 While it is still possible to determine larger side chains such as tryptophan, tyrosine and  
158 phenylalanine in maps of approximately 4 Å (Fig. 4A, marked with blue arrow), it is difficult to  
159 confirm the side chains in maps worse than 4.5 Å resolution (Fig. 4E). In maps with resolutions  
160 below 5 Å (Fig. 4H), it is not possible to reliably identify side chains and unstructured loops. At  
161 6-8 Å only  $\alpha$ -helices were clarified (Rosenthal and Rubinstein, 2015) as demonstrated by the initial  
162 model used (Fig. S6).

163

#### 164 **Comparison of data quality in different image conditions**

165 In order to verify the reconstructed maps, the GS-FSC and the map-to-model FSC (MM-FSC)  
166 were compared (Fig. 5). The gap between the two FSC values were listed in Table 2. The difference  
167 values (Resolution “gap” in Table 2) were averaged in each case, showing (average  $\pm$  standard  
168 error) 0.45 $\pm$ 0.075 Å in Setting A and 0.65 $\pm$ 0.15 Å in Setting B. These smaller gaps between GS-  
169 FSC and MM-FSC of the K2 Summit correlate with the better-quality densities as shown in the  
170 maps (Fig. 4, Table 2). This may also come from the result of the superior DQE curve (Fig. S3)  
171 and Thon rings of the K2 Summit DED (Fig. S4).

172 The reported resolutions of Setting A between 30,000× and 60,000× magnifications showed a  
173 similar parabola shaped curve with Setting B between 40,000× and 100,000× magnifications (Fig.  
174 6). The sampling scales at the specimen were nearly identical within these magnification ranges  
175 (Fig. 6, Table 2). The result suggests that there is an optimal magnification for high-resolution  
176 analysis in each EM setting. The highest resolution was obtained at 50,000× magnification using  
177 Setting A, which correspond to the sample scale of 0.75 Å/pixel (Fig. 6). Similarly, the highest  
178 resolution with Setting B was obtained at 60,000× magnification, which correspond to the sample  
179 scale of 0.95 Å/pixel (Fig. 6). Changing the sample scales on the detector pixel to those on the

180 detector surface, these values are both 0.15 Å/μm (Fig. S7). It further suggests that the highest  
181 resolution is performed when the JEOL 200kV TEMs magnify the image at 0.15 Å/μm on the  
182 detector surface. The difference of the highest-resolution's nominal magnifications of 50,000× on  
183 K2 summit and 60,000× on DE-20 is caused by the difference of the detector positions in each  
184 TEM.

185 When calculating Rosenthal-Henderson ("B-factor") plots (Fig. 7), Setting A has a clear  
186 advantage over Setting B. The 50,000× Setting A dataset estimates the best B-factor (-161) with  
187 40,000× a close second (-172). All Setting A datasets show a non-linear relationship between the  
188 points; as particle count drops, resolution decrease accelerates (Fig. 7A). Setting B demonstrates  
189 a similar non-linear relationship in datasets where the estimated B-factor is closer to those in  
190 Setting A. However, in the two datasets which estimate poor B-factor (approximately -300 or  
191 worse) a linear correlation appears (Fig. 7B).

192

### 193 **Automated acquisition**

194 We used β-galactosidase for the sample studied with automation in multi-purpose TEM to  
195 demonstrate that usable resolutions (Fig. 8A, B) may be achieved with things other than apoferritin.  
196 Further details are listed in Table S1. In roughly the same amount of time – one half an operator  
197 day – that we were able to collect ~150 micrographs manually, automation via SerialEM allowed  
198 acquisition of ~450. This is without any of the more advanced automatic collection methods such  
199 as beam shift acquisition (Cheng et al., 2018). Of these micrographs, 370 were deemed usable  
200 post-motion correction and CTF estimation. With automated collection, we achieved a 3.6 Å (Fig.  
201 8C) resolution reconstruction of β-galactosidase (Fig. 8). Calculated B-factor (-162) is comparable  
202 to those of the apoferritin limited datasets of Setting A 40,000× and 50,000× (Fig. 8D).

203

### 204 **Discussion**

205 After calculation of the Rosenthal-Henderson plots (Fig. 7) for all datasets, we estimated that  
206 collecting double or triple the original dataset for the Setting A at 50,000× would achieve 3 Å  
207 global resolution. We collected further 126 micrographs to complement the 153 original  
208 micrograph movies – this approximately doubled the number of usable particles but was slightly  
209 less than double the raw number of micrographs. Using RELION 3.0.8, this did not improve  
210 resolution achieved, however moving to a testing build of RELION 3.1, with improved calculation

211 for optical parameters, permitted a 3.0 Å reconstruction with local resolution extending to 2.6 Å  
212 when calculated by *bloccres* (Heymann, 2001; Heymann and Belnap, 2007). After searching the  
213 EMDB (Patwardhan, 2017) this is currently the highest resolution achieved when using a 200KV  
214 microscope and (non-autoloader) side-entry cryo-holder system.

215

## 216 **Comparison of EM Settings A and B**

217 The first test of a reconstruction is the reported resolution and coincident FSC curve (Fig. S1A,  
218 Fig. 5). With this metric, and using the “limited quantity” datasets, Setting A is generally 0.5 Å  
219 superior to Setting B, except for 60,000× (Setting A) and 100,000× (Setting B), which can be  
220 attributed to the low total number of particles in the narrower field of view of the K2 Summit DED  
221 (Fig 2, Table 2). However, if comparing 60,000× (Setting A) with 100,000× (Setting B) (where  
222 both have a sampling frequency of 0.62 Å/pixel) then again Setting A becomes superior. While  
223 this absolute scale comparison is useful, 100,000× magnification for Setting B has a  
224 commensurately higher dose rate and suffers from more instability/drift than 60,000× of Setting  
225 A, which is reflected in the Rosenthal-Henderson B-factor estimation (Fig. 7B).

226 The best resolution was achieved at different magnifications in each setting (Figs. 4-6). When  
227 we processed the limited micrographs using RELION 3.0, the highest “limited set” resolution of  
228 3.3 Å was obtained at 50,000× magnification with Setting A, while the highest resolution of 3.8 Å  
229 was obtained at 60,000× magnification with Setting B (Fig. 5, Table 2). Setting A would appear  
230 to have optimal conditions at 40,000-50,000×; which magnification recommended would depend  
231 on the molecular weight of the sample. Setting B showed little difference between three  
232 magnifications (60,000× and 80,000× are detailed herein, the intermediate of the three – 50,000×  
233 – is not), although the operator reported that 80,000× was more challenging to acquire than  
234 50,000× or 60,000×, while 100,000× was even more so. Setting B provides the ability to collect  
235 superior numbers of particles from the same number of micrographs, which may prove  
236 advantageous in the case of larger or more heterogenous samples. The use of an Omega filter on  
237 Setting B does not appear to either help or hinder processing of data, although it does improve  
238 image contrast moderately (Fig. 2) which makes manual data acquisition more user friendly.

239 We hypothesise that the superior performance of Setting A when compared to Setting B is  
240 primarily the result of better spherical aberration (Cs: 2 mm) of the JEM-2100F microscope over  
241 the JEM-2200FS (Cs: 4.2 mm, which has a worse-than-normal Cs due to modifications necessary

242 for the use of Zernike phase plate hardware) and improved DQE of the K2 Summit DED in the  
243 lower frequencies. It would be interesting (and troublesome) to swap the detectors between  
244 microscopes and collect further datasets to identify which of these factors has the greater effect.

245

### 246 **Behaviour of microscope Settings at different magnifications**

247 When the sampling scales on each detector are adjusted respective to the detector surface area, the  
248 scale of 50,000 $\times$  on K2 Summit detector (0.15  $\text{\AA}/\mu\text{m}$ ) of Setting A corresponds to 60,000 $\times$  on DE-  
249 20 detector (0.15  $\text{\AA}/\mu\text{m}$ ) of Setting B. At this point the conditions for the best resolution were  
250 coincident between the two acquisition settings (Fig. S7). Similar achievable reconstruction  
251 resolution was demonstrated at slightly higher and lower TEM magnifications, with resolution  
252 suffering as sampling scale deviated from 0.15  $\text{\AA}/\mu\text{m}$  at the detector face. This would suggest that  
253 there is an optimal magnification for both combinations of microscope and detector at the same  
254 detector scale. This should be further investigated across a wider range of microscopes and  
255 detectors.

256 In the case of analysing with the same number of particles, it was thought that the resolution  
257 improves as the sampling scale becomes smaller. In our processing, this is untrue. This is shown  
258 by B-factor plot (Fig. 7) selecting at a given number of particles (e.g.: 10,000 total particles). At  
259 higher magnifications, the vibrations and drift that come from the side-entry cryo-holder become  
260 more critical and influence the data acquisition in a greater manner. While at lower magnifications,  
261 drift and vibrations are less of an issue, and the lower magnification becomes the limiting factor  
262 at the detector. Dose also plays a significant role in the quality of acquired data; at higher  
263 magnifications the electron dose per  $\text{\AA}^2$  at the sample increases negative effects such as radiation  
264 damage, charging, and heating effects resulting in loss of sample mass coupled with large drifts as  
265 ice is vaporised. The above phenomenon occurs even though motion correction is performed. We  
266 hypothesise that adequate motion correction cannot be performed at a frame processing interval of  
267 0.2 s (5 frames per second, fps) at higher dose rates; testing with detectors capable of outputting  
268 final micrograph movies of 20fps or greater may prove whether higher dose rates can be offset by  
269 higher framerates.

270 While particle polishing acts on a per-particle basis, having good drift correction across initial  
271 micrographs results in loss of fewer particles during 2D and 3D classification. In this, patch  
272 correction as implemented by MotionCor2 (or the RELION 3 implementation) is superior to

273 whole-frame correction used by the DE-20 manufacturer scripts (Direct Electron, LP) or UNBLUR  
274 (Grant and Grigorieff, 2015), although less drift is still preferable. This improved sample stability  
275 is one of the advantages of autoloader-equipped microscopes.

276 Although motion correction with dose weighting was performed, there is evidence that at  
277 60,000× (Setting A) and 100,000× (Setting B) magnifications that when the dose is optimal for a  
278 K2 Summit detector, it is too strong for the sample. Thus, there is increased motion of the sample  
279 as the vitrified ice is warmed, combined with faster sample destruction from the electron beam  
280 which together cannot be adequately compensated by per-frame motion processing. Because of  
281 the nature of recent direct electron detectors, the dose at the sample is determined by the optimal  
282 dosage for the detector; to achieve electron counting measurements, this requires a certain  
283 minimum dose per detector pixel. At higher magnifications, this can result in extremely high doses  
284 on the specimen. Stability dependence is further demonstrated by the power spectra acquired using  
285 Pt-Ir film (Fig. S4), where Setting B proves difficult to acquire high quality stable micrographs  
286 and which is reflected in the quality of the reconstruction at 100,000×. For Setting A, Thon rings  
287 are distinguishable to  $<2 \text{ \AA}$  for Setting A (Fig S4A, B), while the last consecutive Thon ring is  
288 visible at  $2.96 \text{ \AA}$  (Fig. S4C, D) for Setting B. At lower magnifications, the limiting factor becomes  
289 Nyquist frequency and DQE. These are likely the reasons for the “sweet spot” for resolution in our  
290 datasets (Fig. 6).

291

## 292 **Validation of the EM-maps**

293 While the gold-standard FSC is a simple “one number” report of a cryo-EM reconstruction, it is,  
294 more precisely, simply a measure of correlation between two independently refined half-maps  
295 (Chen et al., 2013; Herzik et al., 2019a; Scheres and Chen, 2012) and thus does not reflect local  
296 resolution variability. Map-to-model (MM) FSC is a comparison between a simulated volume  
297 generated by a fitted PDB model and either one of the two final half-maps of the GS-FSC or the  
298 post-processed (sharpened) full map. It is useful as a quality-of-fit metric for an atomic model,  
299 particularly if fitting the model via one half-map, and comparing against the second. The MM-  
300 FSC for all Setting A maps is superior to those of the Setting B maps (Fig. 5), although while  
301 apoferritin is generally rigid, there is inherent flexibility in protein which will result in minor  
302 differences between multiple datasets of the same sample.



303 Local resolution (recently combined with local filtering of a map) provides a finer-grain view  
304 of the quality of a reconstruction. The central core of proteins or complexes are generally higher  
305 in resolution as they show less flexibility, although this is not always true as some  
306 proteins/complexes have highly mobile active sites for substrate binding (Nakane et al., 2018).  
307 Apoferritin shows highest resolution at the interaction face between the four bundled helices of  
308 each subunit; the contact points of the subunits and the external surfaces show lower resolution.  
309 The weakest point of an apoferritin reconstruction is the N-terminal of each subunit, similar to X-  
310 ray crystallography where unstructured terminus regions are difficult to resolve.

311 There are many different programs for calculating local resolution; we tested several in the  
312 process of this work – although we did not carry out an exhaustive comparison of all the options  
313 now available – and finally used the Bsoft (Heymann, 2001; Heymann and Belnap, 2007) *bloccres*  
314 module similar to recent work by the Lander laboratory (Herzik et al., 2017; Herzik et al., 2019a;  
315 Herzik et al., 2019b) as it estimates a range of local resolutions while neither obviously over- or  
316 under-estimating, ignoring symmetry or including dramatic resolution transitions.

317 Recent developments (Frenz et al., 2017; Igaev et al., 2019) in molecular dynamics programs  
318 have provided methods for fitting atomic models to electron density maps using methods  
319 independent of classical crystallographic programs such as COOT (Casanal et al., 2019; Emsley  
320 and Cowtan, 2004) or PHENIX (Adams et al., 2010), which have themselves added cryo-EM  
321 optimised functions, and which would appear to work well for “mid-to-low” resolution cryo-EM  
322 maps which have previously been difficult to interpret with the crystallographic packages. We  
323 have not used these here, although are investigating their use for other protein complexes.  
324 Ultimately, the human eye remains a good – if potentially biased – method of examining cryo-EM  
325 maps. The resolution bounds previously described (Rosenthal and Rubinstein, 2015) for the level  
326 of detail which can be expected are a good guide, and it is often immediately apparent whether a  
327 map may be the resolution it purports to be.

328

### 329 **Structural variability of apoferritin**

330 The highest resolution map is that acquired at 50,000× on Setting A (Fig. 1A), where ARG63  
331 shows two distinct conformations (Fig. 1B, marked with black arrow). This can be used as a further  
332 marker of map quality, when density for rotamers becomes distinct. While not as clear as the  
333 example of the T20S proteasome (Herzik et al., 2017), conformational shifts upon metal binding



334 would favour increased metal coordination. Further, apoferritin does exhibit minor flexibility when  
335 reconstructed without symmetry (at a much-reduced resolution) or with symmetry expansion (Fig.  
336 S8).

337 Performing symmetry expansion in RELION 3.0 of 50,000× Setting A and processing with C1  
338 symmetry (Fig. S8A) allows some flexibility in the structure (Fig S8B, resolution variations  
339 between subunits at the 3-fold symmetry site) to appear; the postprocessing-estimated B-factor  
340 value also improves slightly (from -93 to -86) although final estimated resolution of 3.3 Å was  
341 unaffected (Fig. S8C). Side chain estimated resolution decreases in an example subunit when  
342 reconstructed with symmetry expanded asymmetry (Fig. S8E) compared to when octahedral  
343 symmetry is imposed (Fig. S8D), and density for the unstructured loop (Fig. S8E, marked with  
344 black arrow) is stronger. A Rosenthal-Henderson plot was not calculated for the symmetry  
345 expanded reconstruction, although the RELION 3.1-processed increased dataset (Fig. 1) reported  
346 again a slightly higher Rosenthal-Henderson B-factor estimation (-152) than the RELION 3.0-  
347 processed 150 micrograph dataset (-161).

348 The behaviour of the datasets with respect to Rosenthal-Henderson plots and estimated B-  
349 factor shows a potential relationship between increased field of view and lower estimated B-factor.  
350 The lowest magnification of Setting A (30,000×) estimates similar B-factors to Setting B (60,000×  
351 and 80,000×), which has a much wider field of view (Fig. 2) although the very high magnifications  
352 show similarly poor B-factor estimates (Fig. 7). We attribute these effects to microscope, cryo-  
353 holder stability, and radiation damage at the higher magnifications and to increased area for local  
354 motions to occur at lower magnifications.

355

### 356 **Applicability of multi-purpose microscopes in cryo-EM SPA**

357 How valid is the use of a multi-purpose TEM for SPA? It will not challenge the most expensive  
358 equipment combinations; however, this work demonstrates that even when imposing a limit on  
359 data quantity, it is possible to achieve usable resolutions for *de novo* structure determination,  
360 provided that other biochemical data is known. For the purpose, it is important to understand the  
361 limits created by equipment: which magnifications provide the least drift, most easily optimised  
362 dose rate; the detector will influence the rate at which data can be acquired, and potentially usable  
363 particles per micrograph. At these resolutions, DQE appears to have less of an impact than was  
364 hypothesised.

365 When adding automated acquisition, quantity of data acquired during a similar time period  
366 increases, but percentage of good micrographs drops slightly when compared to a skilled operator.  
367 Although the potential advantages for users with respect to use of time and work environment  
368 cannot be overstated, it remains necessary to maintain regular vigilance of cryogen levels as they  
369 are not automatically replenished. The lower symmetry of  $\beta$ -galactosidase offsets the increased  
370 quantity of data that was collected using SerialEM automation software (Fig. 8), although in terms  
371 of particles picked the two proteins were broadly similar (Table 2, Table S1) and demonstrates that  
372 acquisition of lower symmetry protein complexes is viable to achieve usable datasets.

373 There is some utility in comparison of our results to far superior ones of the same complex  
374 obtained elsewhere, such as EMD-9599 (Danev et al., 2019), EMD-9865 (Kato et al., 2019) in the  
375 electron microscopy data bank (EMDB), as they were acquired using equipment providing the  
376 very highest performance possible for cryo-EM SPA. The 1.75 Å map of apoferritin (Wu et al.,  
377 2020) from a 200kV microscope further demonstrates the possibilities with increased quantities  
378 of data when coupled to optimal grids, sample preparation technique and microscope stability.  
379 Although of far greater value is comparing against other datasets, such as the T20S proteasome  
380 (Herzik et al., 2017) where  $\sim 3$  Å (2.8 Å highest local resolution) allowed identification of side  
381 chain orientation and tightly bound water molecules on a 200kV microscope, albeit one equipped  
382 with an autoloader stage and optimised for SPA. We achieved similar clarity with respect to  
383 potential metal-binding sites and residues showing different rotamer states (Fig. 1B, C). While the  
384 symmetry of T20S proteasome is not as high (D7, or 14-fold) as apoferritin, the number of particles  
385 required for this was an order of magnitude higher than the quantity of data acquired herein,  
386 however, exceeding 1,000,000 particles picked and  $\sim 80,000$  used in the final reconstruction.

387 The recent work demonstrating the application of conventional 200kV hardware to proteins  
388  $<100$ kDa (Herzik et al., 2019b) indicates that phase-contrast systems (Danev et al., 2014) are not  
389 a requirement for analysis of proteins of that approximate mass. Herzik *et al.* do further discuss  
390 the difficulties in processing a 50kDa complex, concluding that phase-contrast may be necessary  
391 for these very small complexes, although clarity in 2D class averages may indicate that  
392 improvements in image processing solutions would be sufficient. With the improvements  
393 demonstrated here when reprocessing a dataset in RELION 3.1 versus RELION 3.0, we agree.

394 For SPA using a multi-purpose TEM, the two primary limiting factors are the ability to collect  
395 large volumes of data and maintain sample quality – the latter being something which also affects

396 every TEM, and therefore we consider a null concern for this situation. By achieving a global  
397 resolution of 3 Å with a multi-purpose TEM with widely available hardware and limited datasets  
398 and comparing two multi-purpose TEM setups, we hope that it will encourage potential users of  
399 cryo-EM SPA who do not have access to state-of-the-art facilities.

400

401

## 402 **Acknowledgements**

403 The authors thank Dr. H. Yanagisawa for the gift of the apoferritin test sample, Dr. Jaap Brink  
404 (JEOL USA) and Dr. David Mastronarde for help setting up the SerialEM software, and Mr.  
405 Yoshihiro Arai (Terabase Inc.) and Mr. Takayuki Owada (Kyodo Printing Co. Ltd.) for renting a  
406 Gatan K2 Summit DED. The study was supported by a collaboration program with Terabase Inc.

407

## 408 **Data availability**

409 The cryo-EM reconstructions of all post-processed maps and half maps have been deposited in the  
410 EMDDB under the accession codes: EMD-30096 (3 Å Setting A 50,000×, RELION 3.1), EMD-  
411 30101 (Setting A, 30,000×, RELION 3.0), EMD-30100 (Setting A, 40,000×, RELION 3.0), EMD-  
412 30098 (Setting A, 50,000×, RELION 3.0), EMD-30099 (Setting A, 60,000×, RELION 3.0), EMD-  
413 30097 (Setting A, 50,000×, RELION 3.0, symmetry expanded), EMD-30103 (Setting B, 40,000×,  
414 RELION 3.0), EMD-30105 (Setting B, 60,000×, RELION 3.0), EMD-30106 (Setting B, 80,000×,  
415 RELION 3.0), EMD-30107 (Setting B, 100,000×, RELION 3.0), EMD-30095 (Setting A, 40,000×,  
416 RELION 3.0, Serial-EM acquisition, β-galactosidase).

417

## 418 **Author contributions**

419 Sample preparation: TK, CS, NT, data acquisition; YK, CS, RNBS, KM; data processing; RNBS,  
420 YK, KM, automatic data acquisition: TK, CS, RNBS, KM, draft manuscript; RNBS, YK,  
421 manuscript revision; RNBS, YK, CS, KM, conceptualisation; KM, project oversight; KM.

422

## 423 **Declaration of Interests**

424 The authors declare no competing interests.

425

426

427 **Table 1.** Details of TEM Settings A and B

|                              | <b>EM Setting A</b>       | <b>EM Setting B</b>              |
|------------------------------|---------------------------|----------------------------------|
| <b>Electron microscope</b>   | JEOL JEM-2100F            | JEOL JEM-2200FS                  |
| Gun type                     | 200KV Schottky            | 200KV Schottky                   |
| Cs (mm)                      | 2.0                       | 4.2                              |
| Energy filter                | None                      | $\Omega$ -type (15 eV zero-loss) |
| OLA ( $\mu\text{m}$ )        | 20                        | 20                               |
| <b>Detector</b>              | Gatan K2 Summit           | Direct Electron DE-20            |
| Pixel count                  | $3,708 \times 3,836$      | $5,120 \times 3,840$             |
| Pixel size ( $\mu\text{m}$ ) | 5.0                       | 6.4                              |
| Array size (mm)              | $18 \times 19$            | $33 \times 25$                   |
| Mag. Factor                  | 1.5                       | 1.2                              |
| <b>Cryo-specimen holder</b>  | Gatan 626 LN <sub>2</sub> |                                  |

428

429 **Table 2.** Details of each of eight acquisition conditions

| <b>Data collection</b>                                 | <b>EM Setting A</b> |        |        |        | <b>EM Setting B</b> |        |        |         |
|--------------------------------------------------------|---------------------|--------|--------|--------|---------------------|--------|--------|---------|
| TEM magnification                                      | 30,000              | 40,000 | 50,000 | 60,000 | 40,000              | 60,000 | 80,000 | 100,000 |
| Pixel scale<br>(specimen)( $\text{\AA}/\text{pixel}$ ) | 1.25                | 0.93   | 0.75   | 0.62   | 1.43                | 0.95   | 0.71   | 0.62    |
| Exposure time (s)                                      | 5                   | 5      | 5      | 5      | 5                   | 5      | 5      | 3       |
| Dose per second ( $e^-$<br>$/\text{\AA}^2/\text{s}$ )  | 5.35                | 9.25   | 12.8   | 20.8   | 6.9                 | 8.2    | 10.0   | 20.0    |
| Exposure per frame<br>(s)                              | 0.2                 | 0.2    | 0.2    | 0.2    | 0.2                 | 0.2    | 0.2    | 0.2     |
| <b>Single particle analysis</b>                        |                     |        |        |        |                     |        |        |         |
| Particles per<br>micrograph (avg.)                     | 1,668               | 576    | 329    | 220    | 1,697               | 723    | 378    | 320     |
| Acquired<br>micrographs                                | 100                 | 101    | 153    | 112    | 100                 | 150    | 100    | 183     |
| Final micrographs                                      | 74                  | 70     | 113    | 86     | 74                  | 149    | 95     | 97      |
| Final particle count                                   | 48,767              | 24,605 | 15,680 | 7,476  | 36,723              | 71,528 | 13,933 | 8,762   |
| Resolution ( $\text{\AA}$ ) GS-<br>FSC (0.143)         | 4.0                 | 3.4    | 3.3    | 3.9    | 4.5                 | 3.8    | 3.9    | 5.1     |
| <b>Validation</b>                                      |                     |        |        |        |                     |        |        |         |

|                                          |      |      |      |      |      |      |      |      |
|------------------------------------------|------|------|------|------|------|------|------|------|
| Resolution (Å)                           | 4.5  | 3.6  | 3.8  | 4.5  | 5.3  | 4.3  | 4.2  | 6.1  |
| MM-FSC (0.5)                             |      |      |      |      |      |      |      |      |
| Resolution “gap”                         | 0.5  | 0.2  | 0.5  | 0.6  | 0.8  | 0.5  | 0.3  | 1.0  |
| Rosenthal-Henderson (estimated B-factor) | -244 | -172 | -161 | -198 | -298 | -218 | -190 | -444 |

430

431

432 **Figures**

433

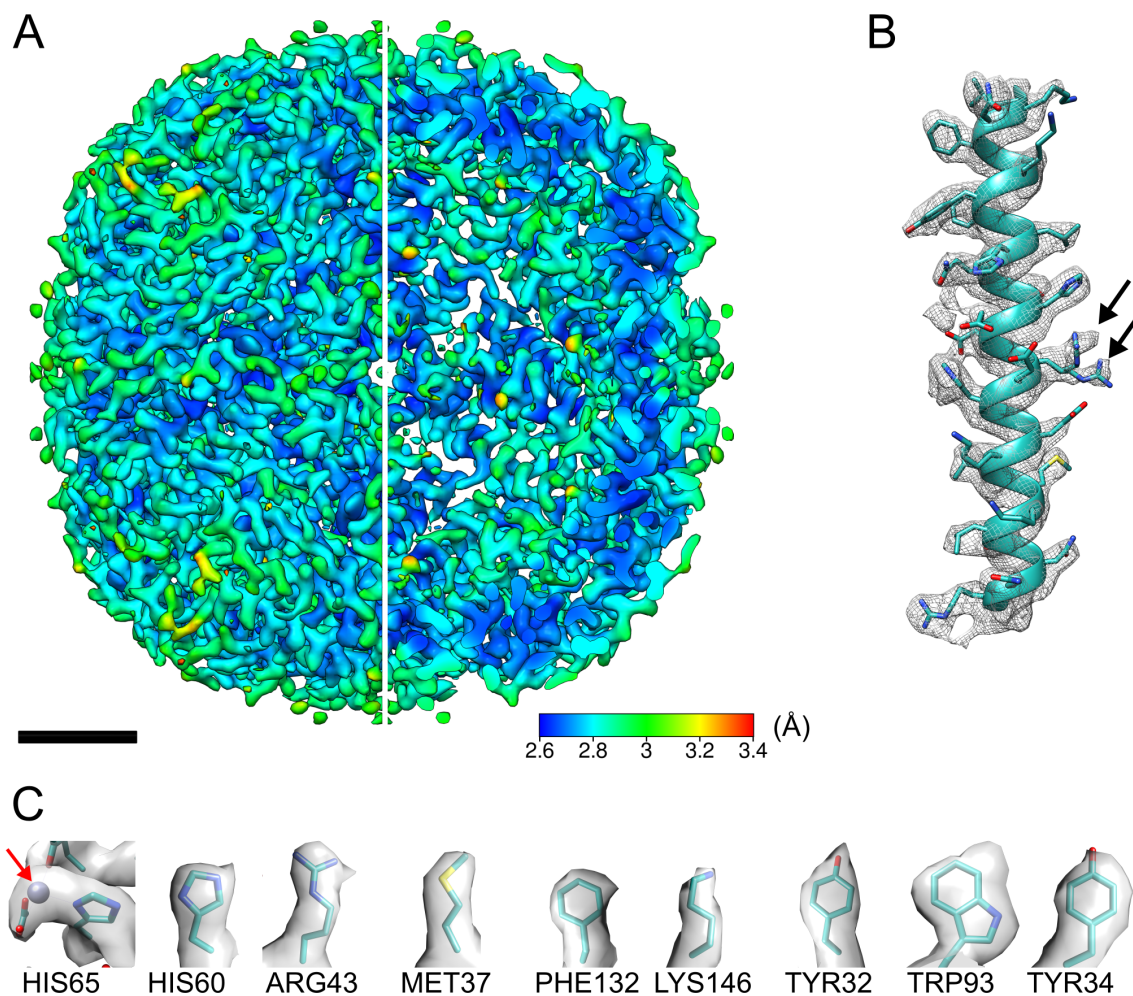

434

435 **Figure 1. 3 Å (global estimated resolution) cryo-EM map of mouse heavy-chain apoferritin.**

436 A) Map coloured by local resolution; one quarter sliced away to allow visualisation of internal  
437 density, scale bar 2 nm. B) Representative helix (Leu48-Arg77) from one subunit, with PDB:2CIH  
438 fitted. Map is contoured at  $3\sigma$ . Black arrows show two rotamers of Arg63. C) Nine representative  
439 sidechains. Red arrow shows a metal density.

440



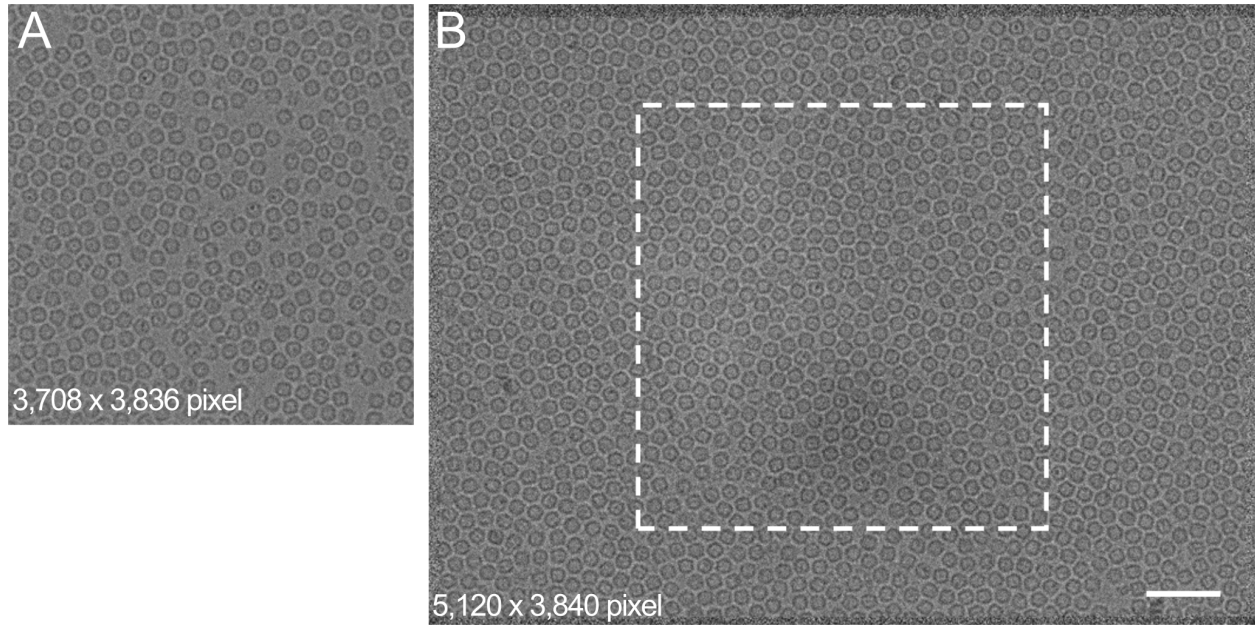

441

442 **Figure 2. Comparison of micrographs from each microscope and detector combination.**

443 Representative micrographs from K2 Summit at 50,000 $\times$  (A) and from DE-20 at 50,000 $\times$  (B), each  
444 2.4  $\mu\text{m}$  under-focus. Micrographs scaled to equivalent size, scale bar 50 nm. White dashed box  
445 overlaid on image (B) highlights field of view difference between detectors. Micrograph  
446 dimensions are included in each figure. As a test sample, purified apoferritin was used. The  
447 number of particles included each micrograph were (A) 383, (B) 1,334, respectively. Absolute  
448 pixel dimensions are 5.0  $\mu\text{m}^2$  for K2 Summit DED and 6.4  $\mu\text{m}^2$  for DE-20 DED.

449



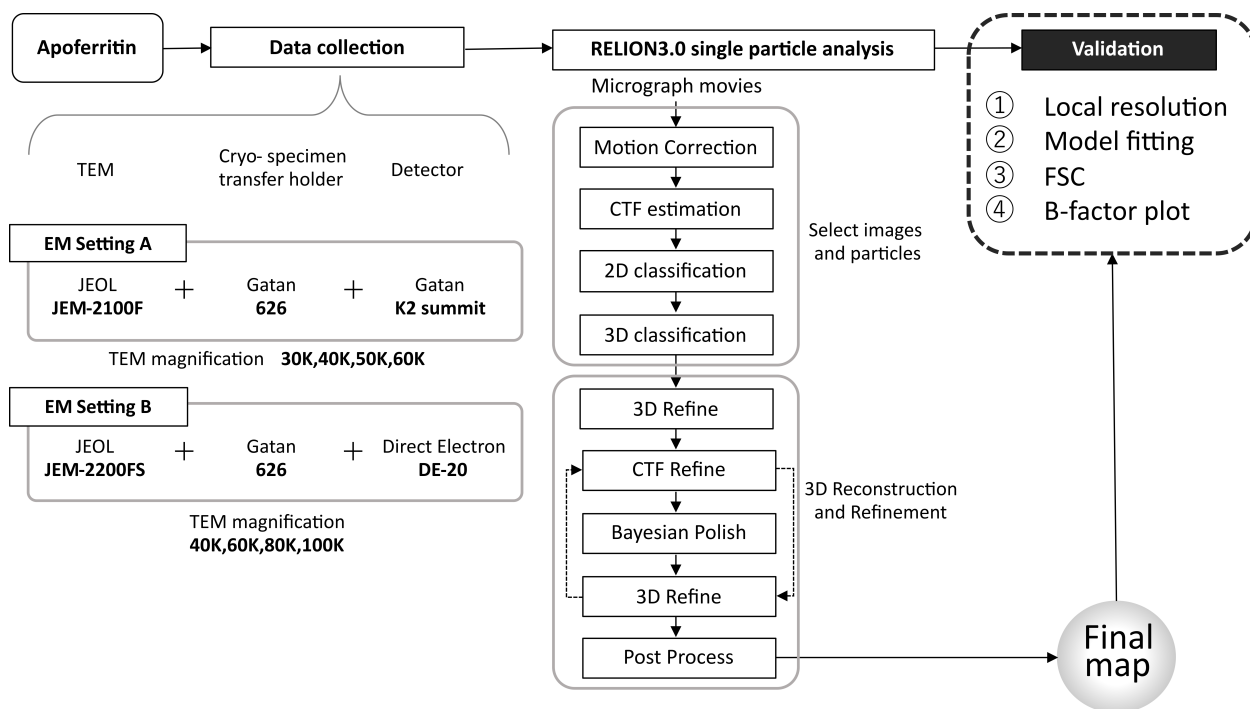

450

451 **Figure 3. Processing workflow.** General schematic of data acquisition and processing is described.

452 Two electron microscope setups were used: JEM-2100F + Gatan 626 + Gatan K2 Summit detector

453 (Setting A) and JEM-2200FS + Gatan 626 + Direct Electron DE-20 detector (Setting B). Each data

454 set was processed using RELION 3.0 and evaluated with procedures shown in the figure. Further

455 specifics of the equipment can be found in Table 1.

456

457

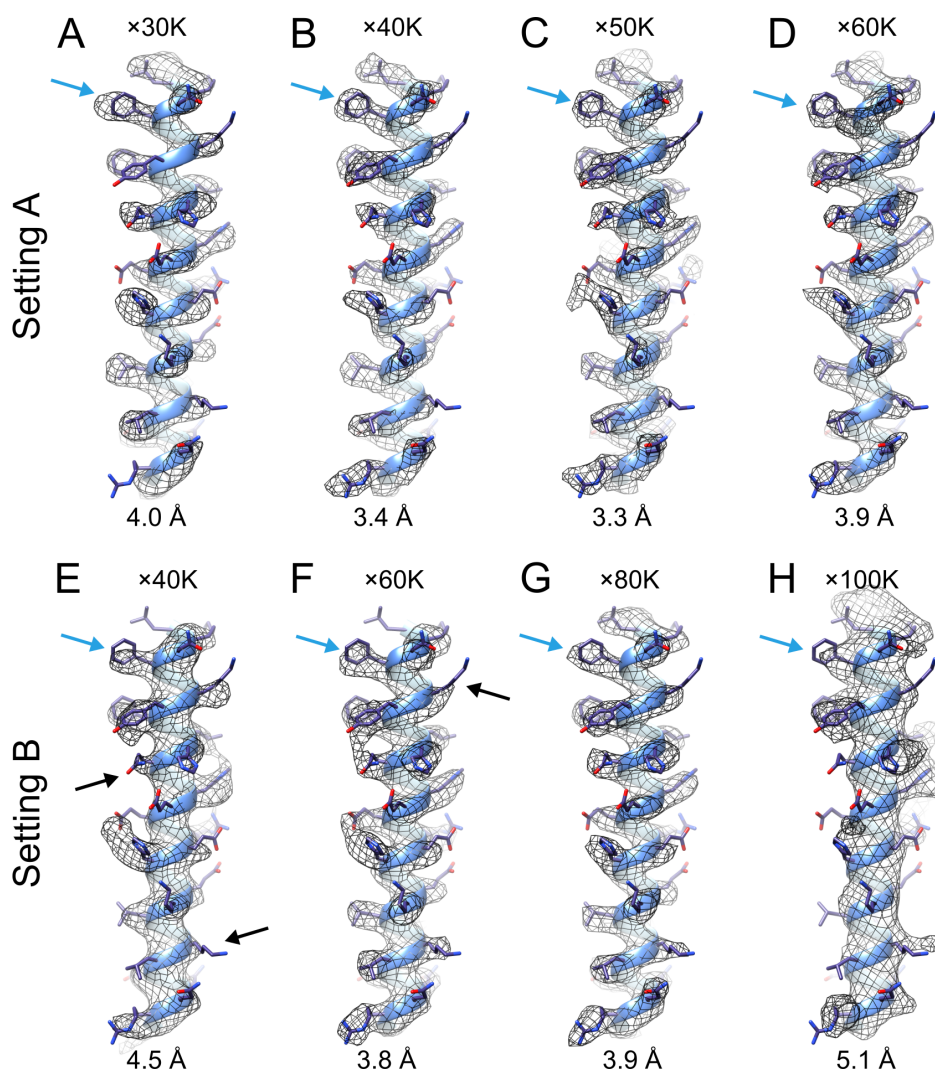

458 **Figure 4. Density comparison between eight reconstruction segments.** A representative  $\alpha$ -helix  
459 (Leu48-Arg77) was extracted from each cryo-EM map and the corresponding atomic model (PDB  
460 ID: 2CIH) was fitted to each map. The maps in the top panel are reconstruct from datasets acquired  
461 by Setting A, at magnifications of  $\times 30\text{K}$  (A),  $\times 40\text{K}$  (B),  $\times 50\text{K}$  (C), and  $\times 60\text{K}$  (D). The map in a  
462 bottom panel are reconstructed from data sets acquired by Setting B, at magnifications of  $\times 40\text{K}$   
463 (E),  $\times 60\text{K}$  (F),  $\times 80\text{K}$  (G), and  $\times 100\text{K}$  (H). The obtained resolutions are labelled in each map.  
464 Leu69 is indicated by blue arrows. Black arrows highlight exemplar sidechains which may present  
465 difficulties in identification.

466

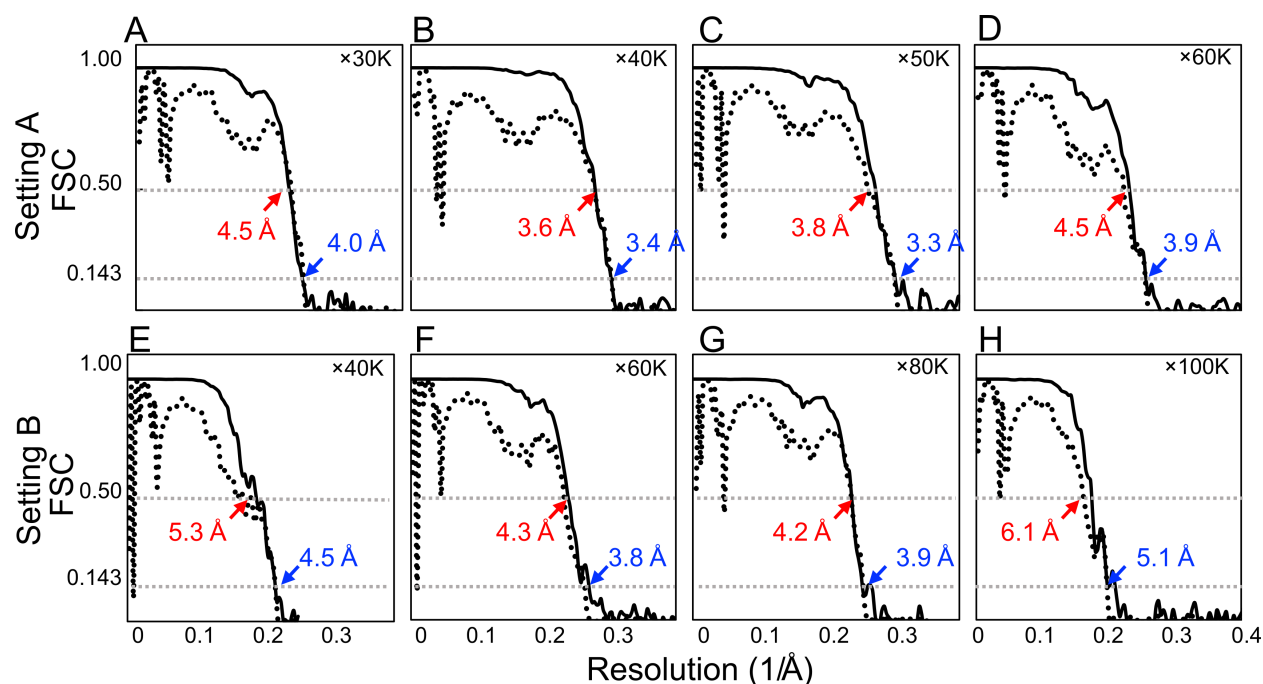

467

468 **Figure 5. GS-FSC and MM-FSC plots of all reconstructions.** GS-FSC (solid lines) was  
469 calculated from independent half maps, and the resolutions was estimated at 0.143 cut-off (blue  
470 labels). MM-FSC (dashed lines) were calculated between 3D reconstructions and maps calculated  
471 from the PDB model (2CIH), and the resolution was estimated at 0.5 cut-off (red labels). The  
472 experimental conditions are ×30K (A), ×40K (B), ×50K (C), and ×60K (D) magnifications using  
473 Setting A, and ×40K (E), ×60K (F), ×80K (G), and ×100K (H) magnifications using Setting B.

474

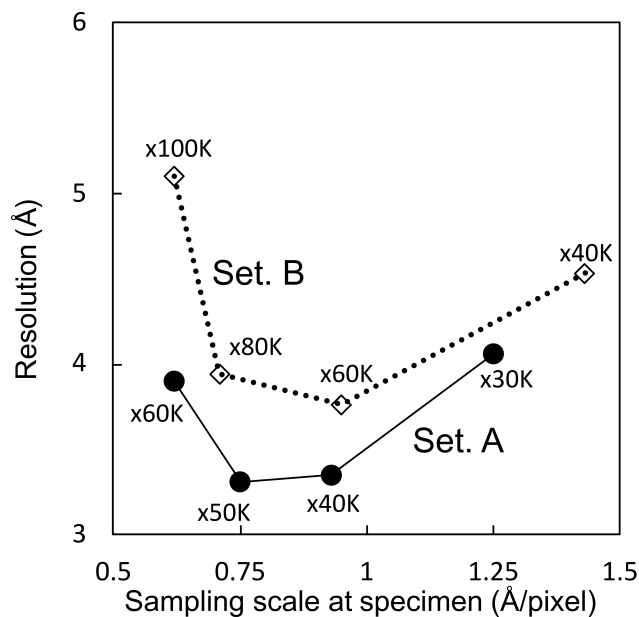

475

476 **Figure 6. Plot of the achieved resolution of each magnification with different EM settings.**

477 The achieved resolutions of Setting A (solid dots) and Setting B (empty diamonds) at each  
478 magnification are connected by solid and dot lines, respectively. X-axis shows the sampling scale  
479 at the specimen.

480

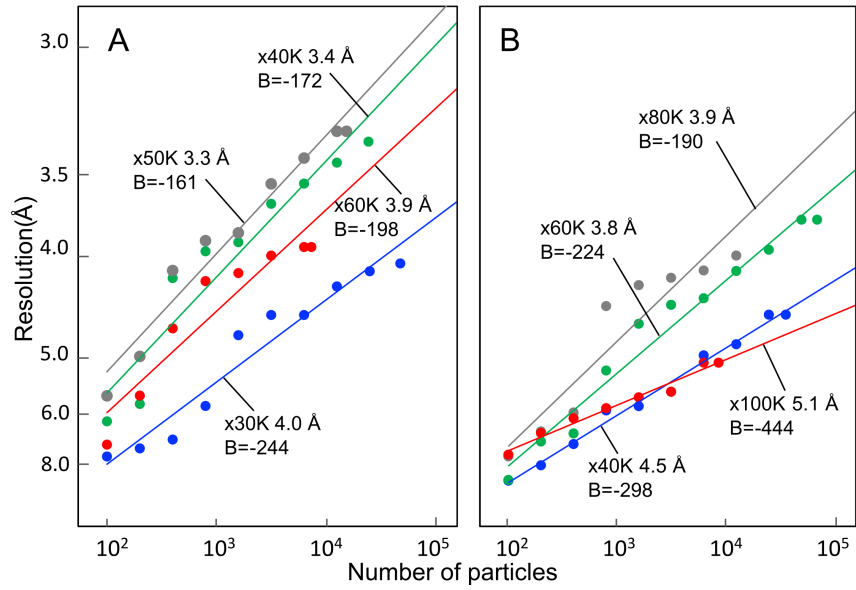

481

482 **Figure 7. B-factor plots of all reconstructions.** The points were calculated by *bfactor\_plot.py* in  
483 RELION 3.0 at different magnifications. B-factor values are estimated from the fitted slopes. (A)  
484 Setting A and (B) Setting B. Magnifications are labelled appropriately.

485

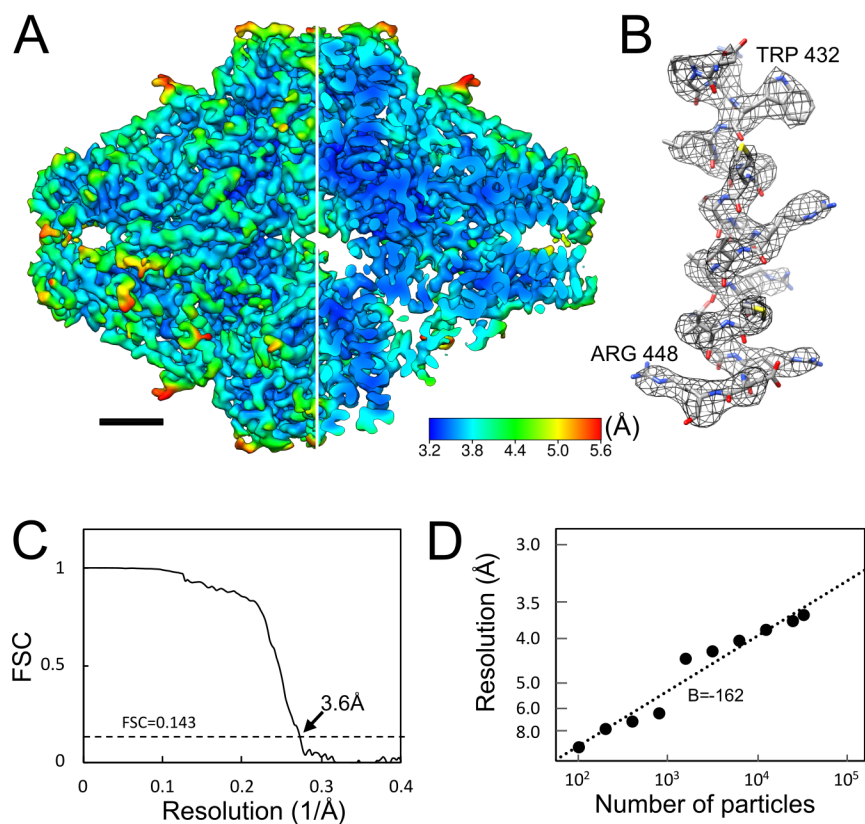

486

487 **Figure 8. β-galactosidase reconstruction from Setting A using SerialEM automated software.**

488 Data was acquired in the same time period as other datasets, except via automation rather than  
489 manual operation. A) 3.6 Å (global estimated resolution) reconstruction coloured by local  
490 resolution, one quarter sliced away to allow visualisation of internal density. Map is contoured at  
491  $5\sigma$ . B) Representative helix (residues ASP429-ARG448) showing side-chain clarity. C) FSC curve.  
492 D) Rosenthal-Henderson plot, estimating B-factor. Estimated B-factor is dependent on whether  
493 extremely low-particle-count reconstructions are included, which influences the overall B-factor  
494 estimate.

495

496

497 **References**

- 498 Adams, P.D., Afonine, P.V., Bunkoczi, G., Chen, V.B., Davis, I.W., Echols, N., Headd, J.J., Hung,  
499 L.W., Kapral, G.J., Grosse-Kunstleve, R.W., McCoy, A.J., Moriarty, N.W., Oeffner, R.,  
500 Read, R.J., Richardson, D.C., Richardson, J.S., Terwilliger, T.C., Zwart, P.H., 2010.  
501 PHENIX: a comprehensive Python-based system for macromolecular structure solution.  
502 *Acta Crystallogr D Biol Crystallogr* 66, 213-221.
- 503 Allen, L.J., D'Alfonso, A.J., Freitag, B., Klenov, D.O., 2012. Chemical mapping at atomic  
504 resolution using energy-dispersive x-ray spectroscopy. *Mrs Bull* 37, 47-52.
- 505 Bammes, B.E., Rochat, R.H., Jakana, J., Chen, D.-H., Chiu, W., 2012. Direct electron detection  
506 yields cryo-EM reconstructions at resolutions beyond 3/4 Nyquist frequency. *Journal of*  
507 *Structural Biology* 177, 589-601.
- 508 Bartesaghi, A., Merk, A., Banerjee, S., Matthies, D., Wu, X., Milne, J.L., Subramaniam, S., 2015.  
509 2.2 Å resolution cryo-EM structure of beta-galactosidase in complex with a cell-permeant  
510 inhibitor. *Science* 348, 1147-1151.
- 511 Baumeister, W., 2002. Electron tomography: towards visualizing the molecular organization of  
512 the cytoplasm. *Curr Opin Struct Biol* 12, 679-684.
- 513 Bhella, D., 2019. Cryo-electron microscopy: an introduction to the technique, and considerations  
514 when working to establish a national facility. *Biophys Rev* 11, 515-519.
- 515 Carragher, B., Kisseberth, N., Kriegman, D., Milligan, R.A., Potter, C.S., Pulokas, J., Reilein, A.,  
516 2000. Legion: an automated system for acquisition of images from vitreous ice specimens.  
517 *J Struct Biol* 132, 33-45.
- 518 Casanal, A., Lohkamp, B., Emsley, P., 2019. Current Developments in Coot for Macromolecular  
519 Model Building of Electron Cryo-microscopy and Crystallographic Data. *Protein Sci*.
- 520 Chen, S., McMullan, G., Faruqi, A.R., Murshudov, G.N., Short, J.M., Scheres, S.H., Henderson,  
521 R., 2013. High-resolution noise substitution to measure overfitting and validate resolution  
522 in 3D structure determination by single particle electron cryomicroscopy. *Ultramicroscopy*  
523 135, 24-35.
- 524 Cheng, A., Eng, E.T., Alink, L., Rice, W.J., Jordan, K.D., Kim, L.Y., Potter, C.S., Carragher, B.,  
525 2018. High resolution single particle cryo-electron microscopy using beam-image shift. *J*  
526 *Struct Biol* 204, 270-275.



- 527 Cressey, D., Callaway, E., 2017. Cryo-electron microscopy wins chemistry Nobel. *Nature* 550,  
528 167.
- 529 Crewe, A.V., Wall, J., Langmore, J., 1970. Visibility of single atoms. *Science* 168, 1338-1340.
- 530 Danev, R., Yanagisawa, H., Kikkawa, M., 2019. Cryo-Electron Microscopy Methodology: Current  
531 Aspects and Future Directions. *Trends Biochem Sci* 44, 837-848.
- 532 Egerton, R.F., 2009. Electron energy-loss spectroscopy in the TEM. *Rep Prog Phys* 72.
- 533 Emsley, P., Cowtan, K., 2004. Coot: model-building tools for molecular graphics. *Acta Crystallogr*  
534 *D Biol Crystallogr* 60, 2126-2132.
- 535 Faruqi, A.R., McMullan, G., 2018. Direct imaging detectors for electron microscopy. *Nuclear*  
536 *Instruments and Methods in Physics Research Section A: Accelerators, Spectrometers,*  
537 *Detectors and Associated Equipment* 878, 180-190.
- 538 Frenz, B., Walls, A.C., Egelman, E.H., Veessler, D., DiMaio, F., 2017. RosettaES: a sampling  
539 strategy enabling automated interpretation of difficult cryo-EM maps. *Nat. Methods* 14,  
540 797-+.
- 541 Grant, T., Grigorieff, N., 2015. Measuring the optimal exposure for single particle cryo-EM using  
542 a 2.6 Å reconstruction of rotavirus VP6. *Elife* 4, e06980.
- 543 Grant, T., Rohou, A., Grigorieff, N., 2018. *cisTEM*, user-friendly software for single-particle  
544 image processing. *eLife* 7.
- 545 Hamaguchi, T., Maki-Yonekura, S., Naitow, H., Matsuura, Y., Ishikawa, T., Yonekura, K., 2019.  
546 A new cryo-EM system for single particle analysis. *J Struct Biol* 207, 40-48.
- 547 Herzik, M.A., Jr., Wu, M., Lander, G.C., 2017. Achieving better-than-3-Å resolution by single-  
548 particle cryo-EM at 200 keV. *Nat Methods* 14, 1075-1078.
- 549 Herzik, M.A., Jr., Fraser, J.S., Lander, G.C., 2019a. A Multi-model Approach to Assessing Local  
550 and Global Cryo-EM Map Quality. *Structure* 27, 344-358 e343.
- 551 Herzik, M.A., Jr., Wu, M., Lander, G.C., 2019b. High-resolution structure determination of sub-  
552 100 kDa complexes using conventional cryo-EM. *Nat Commun* 10, 1032.
- 553 Heymann, J.B., 2001. Bsoft: image and molecular processing in electron microscopy. *J Struct Biol*  
554 133, 156-169.
- 555 Heymann, J.B., Belnap, D.M., 2007. Bsoft: image processing and molecular modeling for electron  
556 microscopy. *J Struct Biol* 157, 3-18.

- 557 Igaev, M., Kutzner, C., Bock, L.V., Vaiana, A.C., Grubmuller, H., 2019. Automated cryo-EM  
558 structure refinement using correlation-driven molecular dynamics. *Elife* 8.
- 559 Iudin, A., Korir, P.K., Salavert-Torres, J., Kleywegt, G.J., Patwardhan, A., 2016. EMPIAR: a  
560 public archive for raw electron microscopy image data. *Nat Methods* 13, 387-388.
- 561 Kato, T., Makino, F., Nakane, T., Terahara, N., Kaneko, T., Shimizu, Y., Motoki, S., Ishikawa, I.,  
562 Yonekura, K., Namba, K., 2019. CryoTEM with a Cold Field Emission Gun That Moves  
563 Structural Biology into a New Stage. *Microscopy and Microanalysis* 25, 998-999.
- 564 Kimanius, D., Forsberg, B.O., Scheres, S.H., Lindahl, E., 2016. Accelerated cryo-EM structure  
565 determination with parallelisation using GPUs in RELION-2. *eLife* 5.
- 566 Knappek, E., Lefranc, G., Heide, H.G., Dietrich, I., 1982. Electron microscopical results on  
567 cryoprotection of organic materials obtained with cold stages. *Ultramicroscopy* 10, 105-  
568 110.
- 569 Kuijper, M., van Hoften, G., Janssen, B., Geurink, R., De Carlo, S., Vos, M., van Duinen, G., van  
570 Haeringen, B., Storms, M., 2015. FEI's direct electron detector developments: Embarking  
571 on a revolution in cryo-TEM. *Journal of Structural Biology* 192, 179-187.
- 572 Mastronarde, D.N., 2005. Automated electron microscope tomography using robust prediction of  
573 specimen movements. *Journal of Structural Biology* 152, 36-51.
- 574 McMullan, G., Faruqi, A.R., Henderson, R., 2016. Direct Electron Detectors. *Methods Enzymol*  
575 579, 1-17.
- 576 Morishita, S., Yamasaki, J., Tanaka, N., 2013. Measurement of spatial coherence of electron beams  
577 by using a small selected-area aperture. *Ultramicroscopy* 129, 10-17.
- 578 Murata, K., Wolf, M., 2018. Cryo-electron microscopy for structural analysis of dynamic  
579 biological macromolecules. *Biochim. Biophys. Acta* 1862, 324-334.
- 580 Nakane, T., Kimanius, D., Lindahl, E., Scheres, S.H.W., 2018. Characterisation of molecular  
581 motions in cryo-EM single-particle data by multi-body refinement in RELION. *eLife* 7.
- 582 Nannenga, B.L., Gonen, T., 2019. The cryo-EM method microcrystal electron diffraction  
583 (MicroED). *Nature Methods* 16, 369-379.
- 584 Patwardhan, A., 2017. Trends in the Electron Microscopy Data Bank (EMDB). *Acta Crystallogr*  
585 D 73, 503-508.
- 586 Punjani, A., Rubinstein, J.L., Fleet, D.J., Brubaker, M.A., 2017. cryoSPARC: algorithms for rapid  
587 unsupervised cryo-EM structure determination. *Nat Methods* 14, 290-296.

- 588 Richter, G.W., 1959. Internal Structure of Apoferritin as Revealed by the "Negative Staining  
589 Technique". *J Biophys Biochem Cytol* 6, 531-534.
- 590 Rosenthal, P.B., Rubinstein, J.L., 2015. Validating maps from single particle electron  
591 cryomicroscopy. *Curr. Opin. Struct. Biol.* 34, 135-144.
- 592 Ruskin, R.S., Yu, Z.H., Grigorieff, N., 2013. Quantitative characterization of electron detectors  
593 for transmission electron microscopy. *Journal of Structural Biology* 184, 385-393.
- 594 Russo, C.J., Passmore, L.A., 2014. Electron microscopy: Ultrastable gold substrates for electron  
595 cryomicroscopy. *Science* 346, 1377-1380.
- 596 Scheres, S.H., Chen, S., 2012. Prevention of overfitting in cryo-EM structure determination. *Nat.*  
597 *Methods* 9, 853-854.
- 598 Toussaint, L., Bertrand, L., Hue, L., Crichton, R.R., Declercq, J.P., 2007. High-resolution X-ray  
599 structures of human apoferritin H-chain mutants correlated with their activity and metal-  
600 binding sites. *J Mol Biol* 365, 440-452.
- 601 Wu, M., Lander, G.C., Herzik Jr, M.A., 2020. Sub-2 Angstrom resolution structure determination  
602 using single-particle cryo-EM at 200 keV. *Journal of Structural Biology: X*, 100020.
- 603 Zheng, S.Q., Palovcak, E., Armache, J.P., Verba, K.A., Cheng, Y., Agard, D.A., 2017.  
604 MotionCor2: anisotropic correction of beam-induced motion for improved cryo-electron  
605 microscopy. *Nat Methods* 14, 331-332.
- 606 Zivanov, J., Nakane, T., Forsberg, B.O., Kimanius, D., Hagen, W.J., Lindahl, E., Scheres, S.H.,  
607 2018. New tools for automated high-resolution cryo-EM structure determination in  
608 RELION-3. *Elife* 7.

609

610

## 611 **Methods**

612

### 613 **Cryo-electron microscopy**

614 High-symmetry (24-fold/octahedral) heavy-chain apoferritin was used as a test specimen, which  
615 was the generous gift of Dr. H. Yanagisawa, University of Tokyo.  $\beta$ -galactosidase (SIGMA-  
616 ALDRICH, St. Louis, MO) was purified by gel filtration on a Superdex-200 size-exclusion  
617 chromatography column connected to an ÄKTA FPLC apparatus (GE Healthcare Bio-Sciences,  
618 Piscataway, NJ) with an elution buffer comprised of 25 mM Tris (pH 8), 50 mM NaCl, 2 mM

619 MgCl<sub>2</sub> and 1mM TCEP. An aliquot of sample solution was applied to standard molybdenum  
620 Quantifoil grids R1.2/1.3 (Quantifoil Micro Tools GmbH) and vitrified by rapid plunging in  
621 liquefied ethane using a Vitrobot Mark IV (Thermo Fisher Scientific) at 95% humidity and 4 °C.  
622 The frozen grid was mounted on a Gatan 626 cryo-transfer specimen holder at liquid nitrogen  
623 temperature and loaded into either a JEM2100F microscope (JEOL) equipped with a K2 Summit  
624 DED (Gatan) (Setting A) or a JEM2200FS microscope (JEOL) equipped with a DE-20 DED  
625 (Direct Electron LP) (Setting B). Magnifications were varied and are detailed in Table 2. Both  
626 microscopes were operated with thermal Schottky electron source at 200kV. In the case of  
627 JEM2200FS, an Omega-type energy filter was used with a slit width of 15 eV. Spherical  
628 aberrations of each pole piece were 2.0 mm (JEM2100F) and 4.2 mm (JEM2200FS). The  
629 illumination conditions were optimized for K2 Summit counting mode (8 e<sup>-</sup>/pixel/sec on detector)  
630 and maintained through DE-20 acquisition for comparison purposes via low dose acquisition,  
631 although at 80,000× and 100,000× magnification the dose rate for DE-20 acquired data was  
632 considered very high. Further details can be found in Table 2. Movies were collected over a  
633 minimum of 3 seconds at 5 fps (frames per second) in both detectors.

634

### 635 **Image processing**

636 Movies were motion-corrected using the MotionCor2 algorithm (Zheng et al., 2017) as  
637 implemented in RELION 3 (Zivanov et al., 2018) using dose-weighting and patch correction with  
638 5x5 grid for K2 Summit DED and 5x3 grid for the DE-20 DED. CTF was estimated by CTFFIND4  
639 (4.1.10) (Rohou and Grigorieff, 2015). Particles were picked by either a) using the RELION 3  
640 LoG-based (Laplacian of Gaussian) auto picker (Zivanov et al., 2018) or b) manually picking 100-  
641 200 particles, as the shape of apoferritin means that more particles are not needed for autopicking.  
642 The box size was determined so that one edge was between 180 to 240 Å, and extracted particles  
643 were 2D-classified. Good classes were used as a reference for a second round of auto picking. The  
644 extracted particles were sorted against the autopicking references and the worst particles discarded,  
645 after which they were subjected to 3D classification using a map generated *ab initio* using the  
646 cisTEM (Grant et al., 2018) algorithm as a reference, with octahedral symmetry (Fig. S5). The  
647 best class(es) were selected, and a map was refined via Refine3D followed by postprocessing. For  
648 further optimization, CTF refinement and Bayesian polishing were performed on the obtained  
649 input particles, and Refine3D was performed again to obtain the final map. Local resolution was

650 calculated using *blocres* (with default settings but defining symmetry) from the Bsoft package  
651 (Heymann and Belnap, 2007). The procedure is summarized in Fig. 3. Processing in RELION 3.1  
652 proceeded in a similar fashion except for the particle sorting step, which has been removed in the  
653 current testing versions of RELION 3.1. Visualisation of 2D and 3D images were carried out using  
654 RELION (Zivanov et al., 2018), Fiji (Schindelin et al., 2012) or UCSF Chimera 1.11.2 (Pettersen  
655 et al., 2004) depending on dimensionality.

656

### 657 **Model fitting and map validation**

658 An x-ray crystallographic-derived atomic model (PDBID: 2CIH) was fitted to the obtained eight  
659 maps using the “fit in map” function in UCSF Chimera (1.11.2) (Pettersen et al. 2004). The maps  
660 were segmented using SEGGER (v1.4.9) (Pintilie et al., 2010) and an  $\alpha$ -helix corresponding to  
661 residues 48-77 was visualized for each map. FSC curves of each of the data sets were calculated.  
662 The correlation between half-maps (GS-FSC) (Chen et al., 2013) was estimated by 0.143 cut-off  
663 (Rosenthal and Henderson, 2003), and the correlation between map and atomic model (PDB ID:  
664 2CIH) (MM-FSC) was calculated with 0.5 cut-off. The PDB-based atomic model map was  
665 generated using UCSF Chimera's “*molmap*” function (Pettersen et al., 2004) at the GS-FSC  
666 resolution of each reconstructed map. The CTFFIND estimated resolution was assessed by analysis  
667 of the logfiles generated by CTFFIND4 (Rohou and Grigorieff, 2015). B-factor plots were  
668 calculated by running an appropriately modified copy of RELION's script, *bfactor\_plot.py*. The  
669 script randomly selects subsets of particles from each data set and executes Refine3D and  
670 Postprocess steps. Plotting the natural logarithm of each particle subset against the inverse of the  
671 squared resolution for each refinement allows estimation of particle and dataset quality by  
672 correlation of a linear fit (Zivanov et al., 2018).

673

### 674 **Assessment of TEM's performance**

675 DQE curves were measured using the shadow of a beam stopper. The obtained data was processed  
676 by FindDQE (Ruskin et al., 2013). Thon rings are compared with two TEM settings by using FFT  
677 of Pt-Ir micrograms with the same data acquisition condition. Radial profiles were generated by  
678 Gatan Microscopy Suite 3 (Gatan, Inc.).

679

### 680 **References: materials and methods**

681 Grant, T., Rohou, A., Grigorieff, N., 2018. *cisTEM*, user-friendly software for single-particle  
682 image processing. *eLife* 7.

683 Heymann, J.B., Belnap, D.M., 2007. Bsoft: image processing and molecular modeling for electron  
684 microscopy. *J Struct Biol* 157, 3-18.

685 Pettersen, E.F., Goddard, T.D., Huang, C.C., Couch, G.S., Greenblatt, D.M., Meng, E.C., Ferrin,  
686 T.E., 2004. UCSF Chimera--a visualization system for exploratory research and analysis.  
687 *J. Comput. Chem.* 25, 1605-1612.

688 Pintilie, G.D., Zhang, J., Goddard, T.D., Chiu, W., Gossard, D.C., 2010. Quantitative analysis of  
689 cryo-EM density map segmentation by watershed and scale-space filtering, and fitting of  
690 structures by alignment to regions. *J Struct Biol* 170, 427-438.

691 Rohou, A., Grigorieff, N., 2015. CTFFIND4: Fast and accurate defocus estimation from electron  
692 micrographs. *J. Struct. Biol.* 192, 216-221.

693 Rosenthal, P.B., Henderson, R., 2003. Optimal determination of particle orientation, absolute hand,  
694 and contrast loss in single-particle electron cryomicroscopy. *J Mol Biol* 333, 721-745.

695 Ruskin, R.S., Yu, Z.H., Grigorieff, N., 2013. Quantitative characterization of electron detectors  
696 for transmission electron microscopy. *Journal of Structural Biology* 184, 385-393.

697 Schindelin, J., Arganda-Carreras, I., Frise, E., Kaynig, V., Longair, M., Pietzsch, T., Preibisch, S.,  
698 Rueden, C., Saalfeld, S., Schmid, B., Tinevez, J.-Y., White, D.J., Hartenstein, V., Eliceiri,  
699 K., Tomancak, P., Cardona, A., 2012. Fiji: an open-source platform for biological-image  
700 analysis. *Nat. Methods* 9, 676.

701 Zheng, S.Q., Palovcak, E., Armache, J.P., Verba, K.A., Cheng, Y., Agard, D.A., 2017.  
702 MotionCor2: anisotropic correction of beam-induced motion for improved cryo-electron  
703 microscopy. *Nat Methods* 14, 331-332.

704 Zivanov, J., Nakane, T., Forsberg, B.O., Kimanius, D., Hagen, W.J., Lindahl, E., Scheres, S.H.,  
705 2018. New tools for automated high-resolution cryo-EM structure determination in  
706 RELION-3. *Elife* 7.

707

708 **Supplementary information**

709

710 **Table S1.** Details of acquisition conditions for  $\beta$ -galactosidase via SerialEM.

| <b>Microscope</b>                             | <b>Setting A</b> |
|-----------------------------------------------|------------------|
| TEM magnification                             | 40,000×          |
| Pixel scale (specimen)(Å/pixel)               | 0.93             |
| Exposure time (s)                             | 5                |
| Dose per second ( $e^-/\text{Å}^2/\text{s}$ ) | 10.6             |
| Exposure per frame                            | 0.2              |
| Micrographs per hour (SerialEM)               | ~75              |
| Data collection time (h)                      | 6                |
| Total micrographs collected                   | 451              |
| Pause for refilling LN <sub>2</sub>           | 2 (10 min. each) |
| <b>Single particle analysis</b>               |                  |
| Particles per micrograph (avg.)               | 381              |
| Number of micrographs used                    | 370              |
| Final particle count                          | 50,523           |
| Resolution (Å) GS-FSC (0.143)                 | 3.6              |
| <b>Validation</b>                             |                  |
| Resolution (Å) MM-FSC (0.5)                   | 4.2              |
| Rosenthal-Henderson (estimated B-factor)      | -162             |

711

712



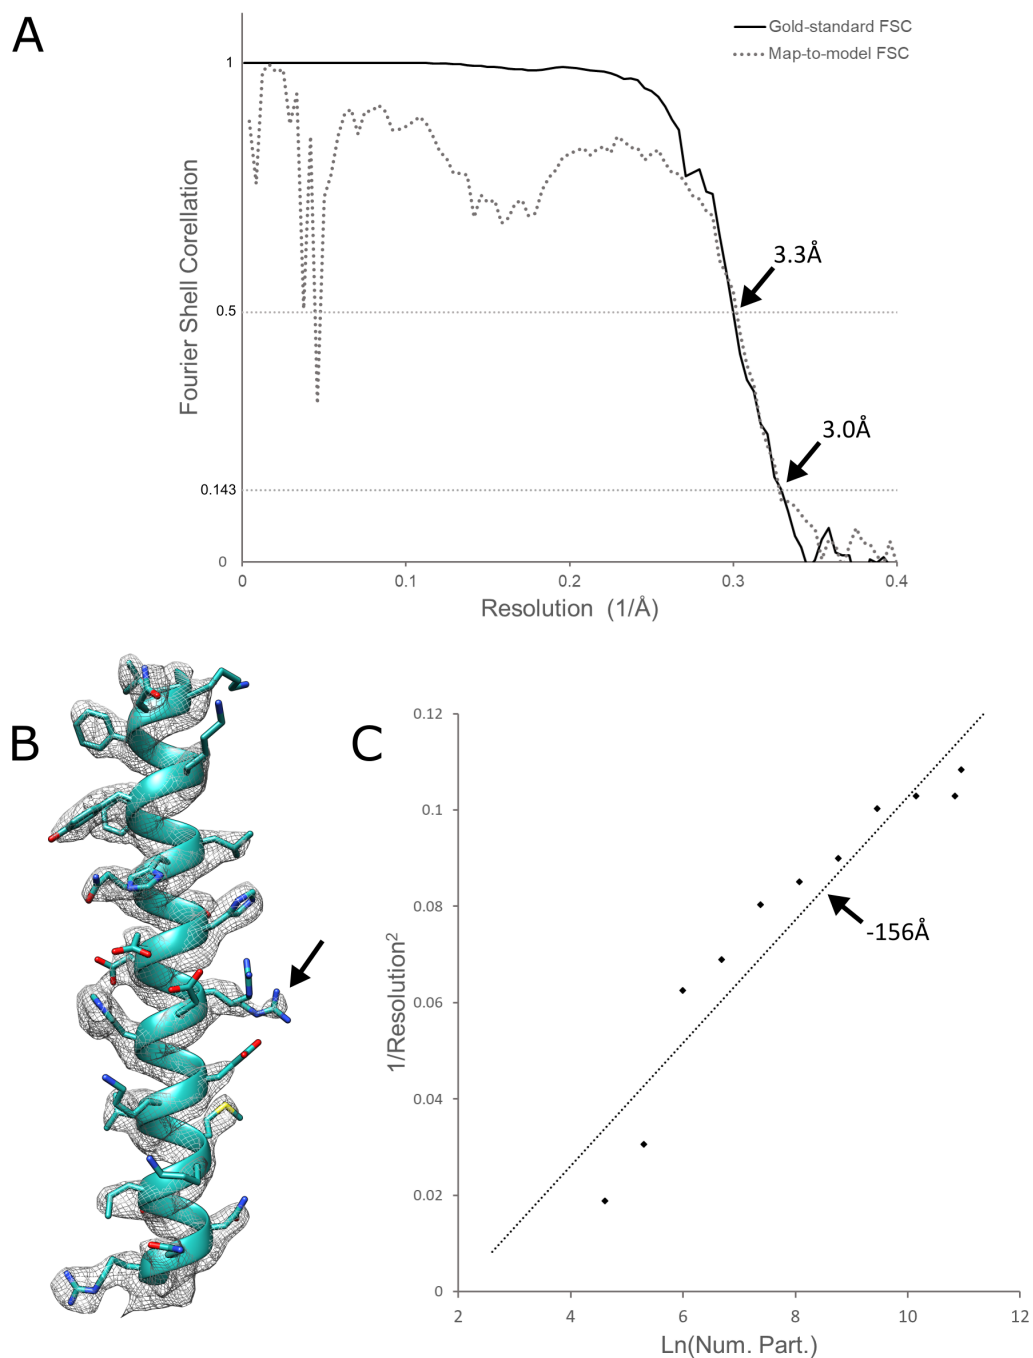

713

714 **Figure S1. Additional data for Fig. 1.** A) Gold-standard FSC (black line) and Map-to-model FSC  
715 (dashed line) for 3 Å (global estimate) apoferritin reconstruction. B) The helix from Fig. 1B,  
716 contoured at 5σ rather than 3σ (Fig. 1B), permitting visualisation of the loss of one of the ARG63  
717 rotamer densities, indicating that it may be a less favourable conformation. C) Rosenthal-  
718 Henderson plot, estimating B-factor to be -162.

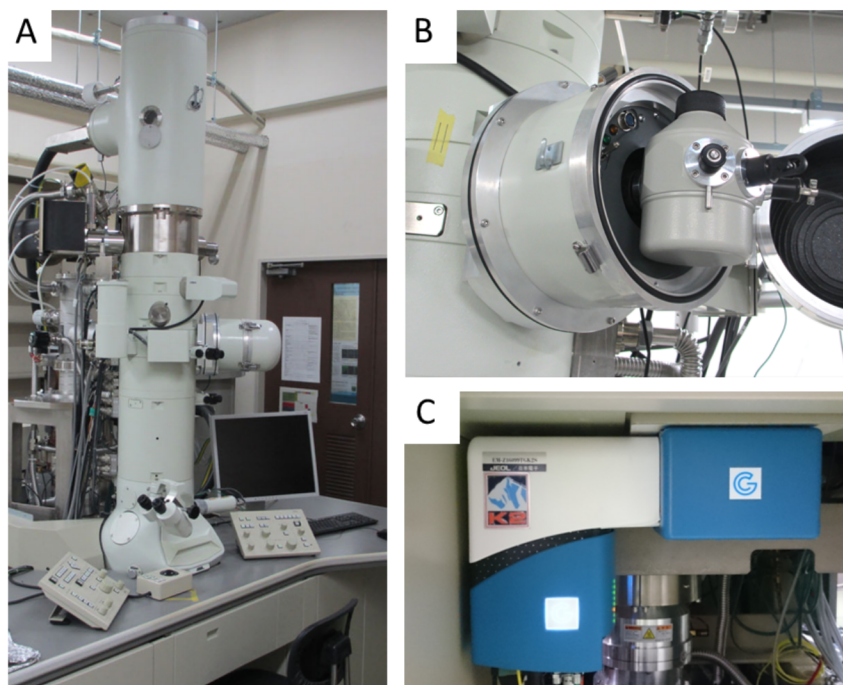

719  
720 **Figure S2. One of two electron microscope settings.** Gatan K2 Summit DED (C) is mounted on  
721 JEM-2100F microscope (A). Gatan 626 cryo-specimen holder is used to sustain the frozen grid at  
722 liquid Nitrogen temperature (B). The second electron microscope setting has been detailed  
723 previously (Murata and Wolf, 2018).  
724

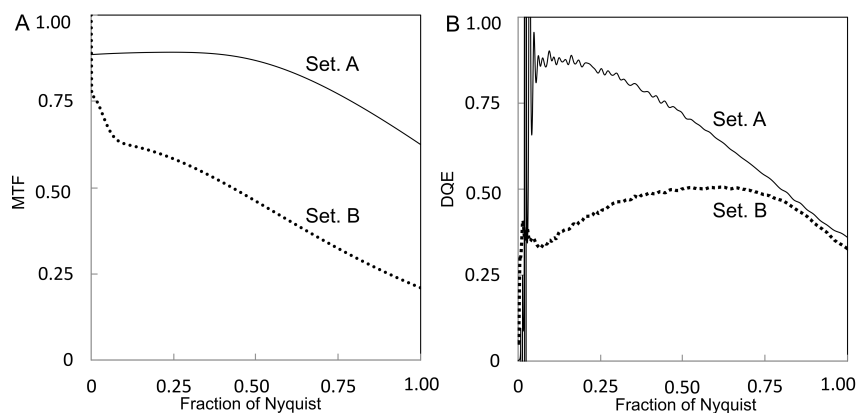

725  
726 **Figure S3. Modulation transfer function (MTF) and Detective quantum efficiency (DQE)**  
727 **curves in EM settings A and B.** A) MTF curves for each setting, B) calculated DQE for each  
728 setting. DQE curves are estimated with a beam stopper using FindDQE software (Ruskin et al.,  
729 2013).

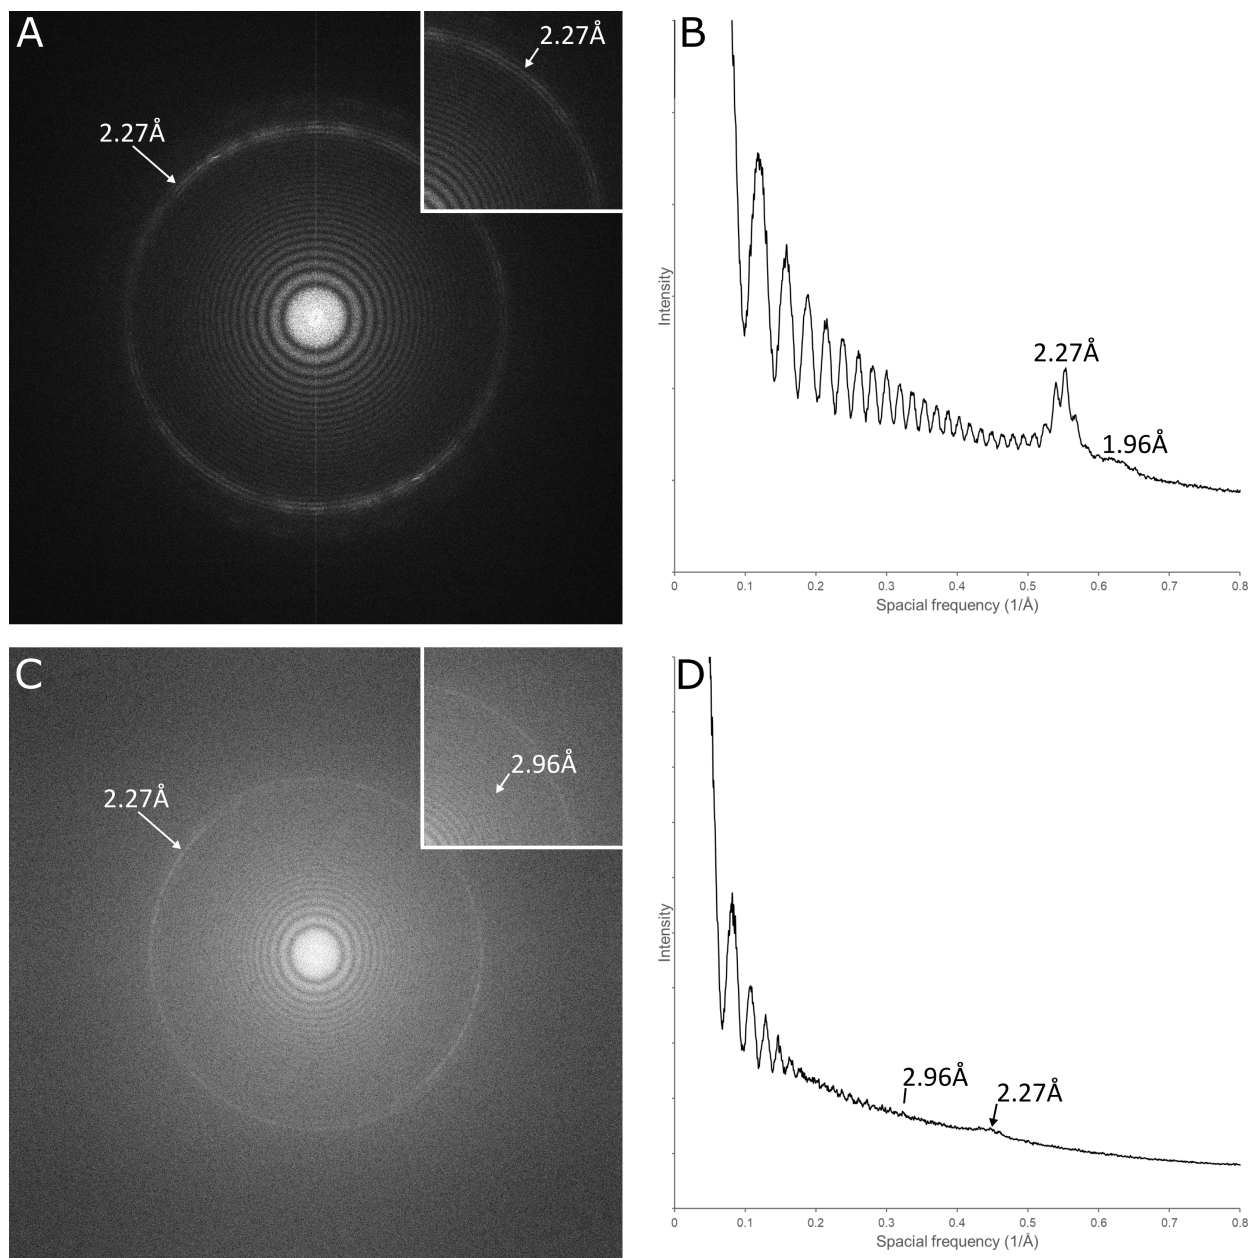

730

731 **Figure S4. Thons rings of FFT images of Pt-Ir film.** Micrographs of Pt-Ir film were acquired by  
732 Setting A and B at 100,000 $\times$ , 0.5 $\mu$ m defocus, and the power spectrum were generated by FFT. A)  
733 Setting A power spectrum, B) Plot of rotationally averaged radial profile of (A), C) Setting B  
734 power spectrum, D) Plot of rotationally averaged radial profile of (C). With Setting A, Thon rings  
735 are clearly distinguishable to the diffraction ring; with Setting B, difficulties in maintaining  
736 stability have caused a slight drift in defocus and minor astigmatism resulting in blurring of the  
737 rotationally averaged profile.

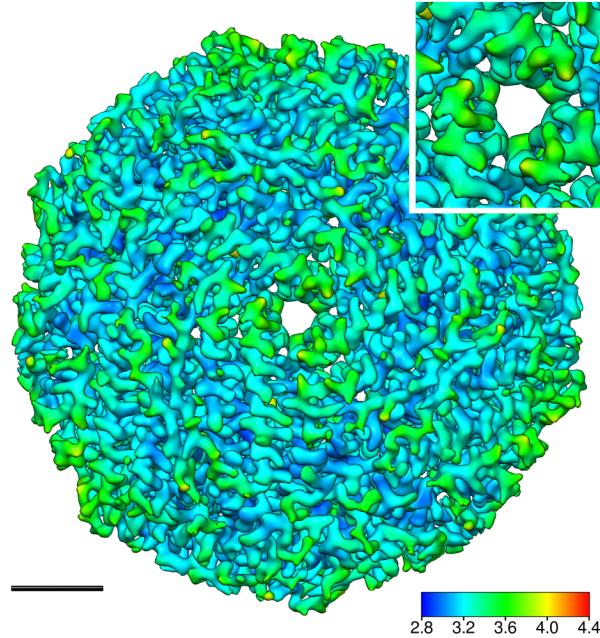

738

739 **Figure S5. The best resolution map of apoferritin at 3.3 Å generated by Setting A.** It was  
740 achieved at 50,000× magnification. The local resolution was coloured from 2.8 to 3.6 Å resolution.  
741 Surface depicted at 4σ. Breakout focussed on 3-fold symmetry axis, where estimated local  
742 resolution for each subunit is identical. Scale bar equals 2 nm.

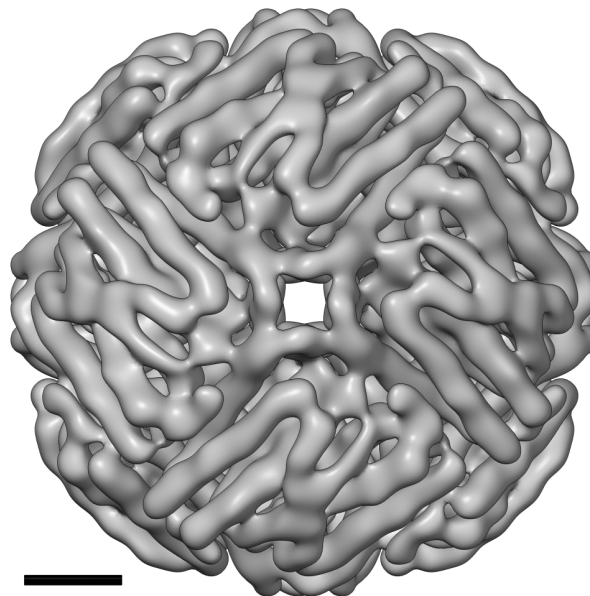

743

744 **Figure S6. A representative *ab initio* 8 Å initial model of apoferritin.** The map was generated  
745 with *cis*TEM (Grant et al., 2018). Scale bar equals 2 nm.

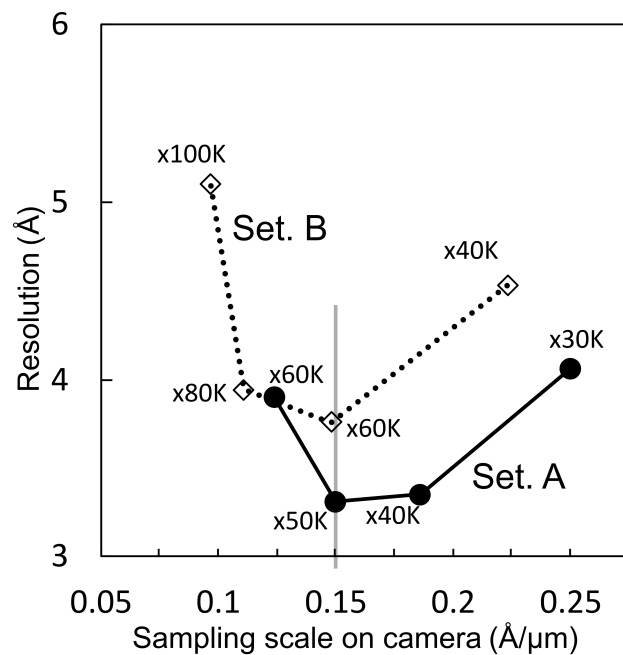

746

747 **Figure S7. Resolution plots for sampling scales at detector face.** Final global estimated  
748 resolution of each reconstruction at different magnifications was generated using Settings A and  
749 B. Vertical grey line indicates the scaling point at which maximum resolution was achieved for  
750 both Settings A and B.

751



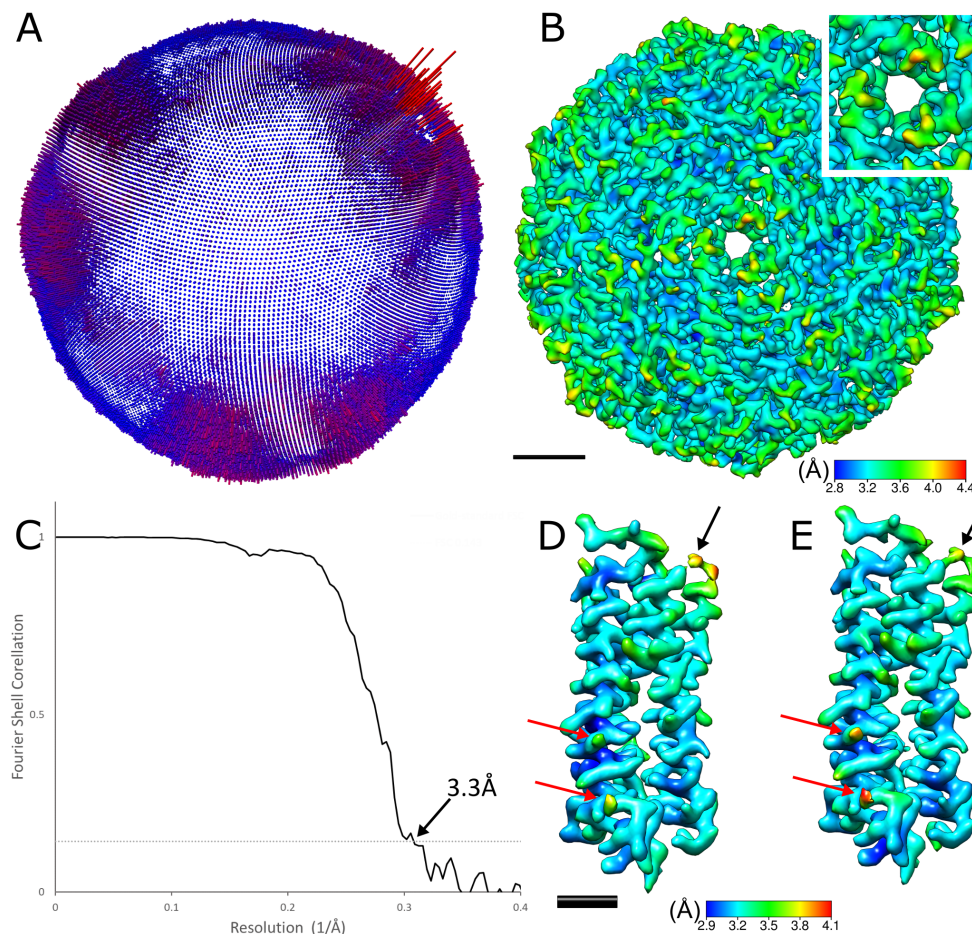

752

753 **Figure S8. Symmetry expanded reconstruction based upon Setting A 50,000× limited dataset.**

754 The map shows variance in angles assigned, which indicates some asymmetry or flexibility in the  
755 protein complex. A) Symmetry expanded angle assignments of apoferritin reconstruction, showing  
756 deviation in angular assignment from octahedral symmetry, B) apoferritin reconstruction viewed  
757 from same angle as (A) coloured by local resolution observed from the 3-fold symmetry axis,  
758 which shows allows example visualisation of resolution variance between three subunits (focused  
759 view in breakout). Scale bars equal 2 nm. C) FSC curve of symmetry expanded apoferritin  
760 reconstruction showing 3.3 Å resolution at GS-FSC (0.143). D) extracted subunit from symmetric  
761 reconstruction, coloured by local resolution, E) extracted subunit from symmetry expanded  
762 (asymmetric) reconstruction, coloured by local resolution. The flexible trans-helix backbone  
763 (black arrows in D, E) is contiguous and higher resolution in the asymmetric reconstruction. Some  
764 residue sidechains are lower resolution, however (red arrows in D, E). Scale bar equals 1nm.
